# Supplementary material for: Oxidation product characterization from ozonolysis of the diterpene ent-kaurene
Source: Copernicus journal article supplement (doi:10.5194/acp-2021-881), 2021-10-27
Supplement: Supplementary file 1 [file acp-2021-881-supplement.pdf]

# Oxidation product characterization from ozonolysis of the diterpene ent-kaurene

5 Yuanyuan Luo<sup>1</sup>, Olga Garmash<sup>1,2</sup>, Haiyan Li<sup>1,3</sup>, Frans Graeffe<sup>1</sup>, Arnaud P. Praplan<sup>4</sup>, Anssi Liikanen<sup>4</sup>,  
Yanjun Zhang<sup>1,5</sup>, Melissa Meder<sup>1</sup>, Otso Peräkylä<sup>1</sup>, Josep Peñuelas<sup>6,7</sup>, Ana María Yáñez-Serrano<sup>6,7,8</sup>,  
Mikael Ehn<sup>1</sup>

<sup>1</sup>Institute for Atmospheric and Earth System Research/Physics, Faculty of Science, University of Helsinki, Helsinki, 00014, Finland

<sup>2</sup>Aerosol Physics Laboratory, Physics Unit, Tampere University, Tampere, 33014, Finland

<sup>3</sup>School of Civil and Environmental Engineering, Harbin Institute of Technology, Shenzhen, 518055, China

10 <sup>4</sup>Atmospheric Composition Research, Finnish Meteorological Institute, Helsinki, 00101, Finland

<sup>5</sup>Univ Lyon, Université Claude Bernard Lyon 1, CNRS, IRCELYON, Villeurbanne, 69626, France

<sup>6</sup>CREAF, Bellaterra (Cerdanyola del Vallès), Catalonia, E08193, Spain

<sup>7</sup>CSIC, Global Ecology Unit, CREAM-CSIC-UAB, Bellaterra (Cerdanyola del Vallès), Catalonia, E08193, Spain

<sup>8</sup>IDAEEA-CSIC, Barcelona, 08034, Spain

15 *Correspondence to:* Yuanyuan Luo ([yuanyuan.luo@helsinki.fi](mailto:yuanyuan.luo@helsinki.fi)) and Mikael Ehn ([mikael.ehn@helsinki.fi](mailto:mikael.ehn@helsinki.fi))

**Table S1. Sampling details and kaurene quantification for Tenax tubes.**

| No. | Sampling start time | Sampling end time | Volume<br>(L) | Kaurene mass<br>(ng) | Kaurene concentration<br>(ppb) |
|-----|---------------------|-------------------|---------------|----------------------|--------------------------------|
| 1   | 01-15 10:08:49      | 01-15 10:36:12    | 5.29          | 1.51                 | 0.03                           |
| 2   | 01-15 14:52:50      | 01-15 15:16:53    | 4.95          | 62.10                | 1.13                           |
| 3   | 01-28 11:30:28      | 01-28 12:00:53    | 5.64          | 0.89                 | 0.01                           |
| 4   | 01-28 13:36:54      | 01-28 13:56:51    | 3.74          | 299.59               | 7.20                           |

## Text S1. Determination of reaction rate coefficient of kaurene with ozone.

There are only a few studies concerning the reaction rate coefficient of diterpenes with O<sub>3</sub>. Moreover, reported reaction rate coefficients span two orders of magnitude between the values given by Helin et al. (2020) and EPI Suite (Environmental  
20 Protection Agency, United States). In order to estimate the reaction rate coefficient of kaurene with O<sub>3</sub> from our own experiments, we constructed a simple kinetic model. The model predicted kaurene and O<sub>3</sub> concentrations using several different kaurene-O<sub>3</sub> reaction rate coefficients. By comparing the trends in simulated and measured kaurene and O<sub>3</sub>, we could estimate the reaction rate coefficient of kaurene ozonolysis, as described below.

To estimate the reaction rate coefficient, we chose the experiment conducted on January 15th (from 12:00 to 3:00 the next  
25 day). During that experiment, both O<sub>3</sub> and kaurene were introduced to the chamber at high concentrations, the Vocus had a constant FIMR pressure, and no seed particles were injected. In the model, the injection was set as the only source for both

kaurene and O<sub>3</sub>. The loss term of kaurene and O<sub>3</sub> included the flush-out and chemical reactions. Hydroxyl radical (OH) can be formed from ozonolysis of alkenes; thus, we also considered OH reactions with kaurene in the model.

In our model, the concentration of species X (i.e., kaurene, O<sub>3</sub>, and OH) at time j equals the concentration at the previous time point (j-1), plus relevant injection/formation rates, minus losses from chemical reactions and flush-out. Therefore, the concentration of kaurene (kau), O<sub>3</sub>, and OH with 0.01 s time resolution can be modeled as follows:

$$O_3(j) = O_3(j-1) + 0.01*(k_{in}*O_{3,in} - k_1*kau(j-1)*O_3(j-1) - k_2*OH(j-1)*O_3(j-1) - k_{flush-out}*O_3(j-1)) \quad (S1)$$

$$kau(j) = kau(j-1) + 0.01*(k_{in}*kau_{in} - k_1*kau(j-1)*O_3(j-1) - k_3*OH(j-1)*kau(j-1) - k_{flush-out}*kau(j-1)) \quad (S2)$$

$$OH(j) = OH(j-1) + 0.01*(y*k_1*kau(j-1)*O_3(j-1) - k_2*OH(j-1)*O_3(j-1) - k_3*OH(j-1)*kau(j-1) - k_{flush-out}*OH(j-1)) \quad (S3)$$

The average residence time in the COALA chamber was 56 min, and the injection rate  $k_{in}$  equals the flush-out rate, i.e.  $k_{in} = k_{flush-out} = 1/(56 \text{ min}) = 3 \times 10^{-4} \text{ s}^{-1}$ .  $O_{3,in}$  and  $kau_{in}$  represent the injected amount of O<sub>3</sub> and kaurene, respectively.  $k_1$ ,  $k_2$ , and  $k_3$  are the reaction rate coefficients of kaurene-O<sub>3</sub>, OH-O<sub>3</sub>, and kaurene-OH, respectively. Out of these, only  $k_2 = 7.3 \times 10^{-14} \text{ cm}^3 \text{ molec}^{-1} \text{ s}^{-1}$  is well known (Atkinson et al., 2004).  $y$  is the OH yield from the reaction of kaurene and O<sub>3</sub>. In summary, the unknown parameters in the model are  $kau_{in}$ ,  $kau$ ,  $k_1$ ,  $k_3$ , and  $y$ . However, we can utilize the knowledge of the relative changes of the kaurene and O<sub>3</sub> concentrations upon changes in input parameters to constrain the ranges of the different parameters.

The modeled experiment consisted of three stages, as shown by the solid lines in Fig. S1. First, kaurene was added without any O<sub>3</sub> into the chamber around 12:00. Second, after ~3 h, O<sub>3</sub> addition began ( $O_{3,in} = 72.5 \text{ ppb}$ ). kaurene reacted with O<sub>3</sub> and kaurene concentration in the chamber reduced. Third, kaurene injection was stopped 5 h later, and kaurene concentration decayed, while ozone concentration slightly increased. We modeled the concentration of kaurene and O<sub>3</sub> in the chamber with different values for the unknown parameters (non-solid traces in Fig. S1). It should be noted that the modeled injection of kaurene at the first stage started around 30 min later than the real injection. The reason for this was that the kaurene response in the chamber was always slower than in the model, presumably due to interactions with the walls of the chamber and tubing. Matching the relative changes of O<sub>3</sub> and kaurene between simulation and measurement during the second and third stages was the main criteria for determining the reaction rate coefficient.

We tested three kaurene-O<sub>3</sub> reaction rate coefficients ( $k_1$ ), with varying rate coefficients of kaurene-OH reaction ( $k_3$ ), OH yield ( $y$ ), and input amount of kaurene ( $kau_{in}$ ). The input parameters of different tests are listed in Table S2, and the results are shown in Fig. S1. As can be seen from the figures, out of all the tested values,  $y=0.5$  and  $k_1=5 \times 10^{-16} \text{ cm}^3 \text{ molec}^{-1} \text{ s}^{-1}$  gave the best simulation of the relative kaurene decay upon O<sub>3</sub> addition in all cases. With these premises, we can then try to estimate  $k_3$  and  $kau_{in}$ . The kaurene decay was not very sensitive to  $k_3$ , with a reasonable agreement for all the modeled values, despite ranging over two orders of magnitude. This partly suggests that the formed OH mainly reacts with other compounds (e.g., contaminants) than kaurene in our chamber. However, the relative increase in O<sub>3</sub> when kaurene was removed around midnight

60 shows a larger difference with different combinations of  $k_3$  and  $k_{au,in}$ . It is not possible for us to determine these values exactly, partly because the kaurene concentration had not fully stabilized before the  $O_3$  injection, thus bringing uncertainty to the final kaurene concentration that would have been achieved without  $O_3$ . However, as a general conclusion, the best agreement between the kaurene and  $O_3$  changes comes with a  $k_{au,in}$  close to the modeled 5.3 ppb, being slightly lower if  $k_3$  was  $10^{-12} \text{ cm}^3 \text{ molec}^{-1} \text{ s}^{-1}$  and slightly higher if  $k_3$  was closer to  $10^{-11} \text{ cm}^3 \text{ molec}^{-1} \text{ s}^{-1}$ . We therefore chose  $k_3 = 1 \times 10^{-11} \text{ cm}^3 \text{ molec}^{-1} \text{ s}^{-1}$  as a reasonable value based on our data, but again conclude that this value is less important for our study. The main result was that we were able to estimate a good value for the kaurene- $O_3$  reaction rate coefficient of  $k_1 = 5 \times 10^{-16} \text{ cm}^3 \text{ molec}^{-1} \text{ s}^{-1}$ . This value was then used to derive the correction factors for the kaurene concentrations measured by the Vocus (Sect. 2.3 in the main text).

70 **Table S2. Input parameters.  $k_1$  refers to the reaction rate coefficient of kaurene- $O_3$ , and  $k_3$  to reaction rate coefficient of kaurene-OH.**

| Parameter                                                 | Modeled values                                                  |
|-----------------------------------------------------------|-----------------------------------------------------------------|
| Kaurene injection in ppb ( $k_{au,in}$ )                  | 1.6, 5.3, 10.6                                                  |
| $k_1$ ( $\text{cm}^3 \text{ molec}^{-1} \text{ s}^{-1}$ ) | $1 \times 10^{-15}$ , $5 \times 10^{-16}$ , $1 \times 10^{-16}$ |
| $k_3$ ( $\text{cm}^3 \text{ molec}^{-1} \text{ s}^{-1}$ ) | $1 \times 10^{-10}$ , $1 \times 10^{-11}$ , $1 \times 10^{-12}$ |
| OH yield ( $\gamma$ )                                     | 1, 0.5                                                          |

<sup>1</sup>Kaurene injection,  $k_{au,in}$ : the injected concentration of kaurene was unknown due to the lack of any authentic diterpene standards. Thus, we used different kaurene concentrations to do the tests. The three values of kaurene injection shown here were determined so that the peak concentrations of kaurene could be close to 1.5 ppb, 5 ppb and 10 ppb in the end of the first stage.

75 <sup>2</sup> $k_1$  was reported to be  $2.4 \times 10^{-15} \text{ cm}^3 \text{ molec}^{-1} \text{ s}^{-1}$  by Helin et al. (2020) and  $1.2 \times 10^{-17} \text{ cm}^3 \text{ molec}^{-1} \text{ s}^{-1}$  by EPI Suite. Thus, we test three  $k_1$  values within the range of  $1 \times 10^{-15} - 1 \times 10^{-16} \text{ cm}^3 \text{ molec}^{-1} \text{ s}^{-1}$ .

<sup>3</sup>The range of reaction rate coefficient of kaurene-OH,  $k_3$  for testing was determined based on the reported results of monoterpenes and sesquiterpenes.

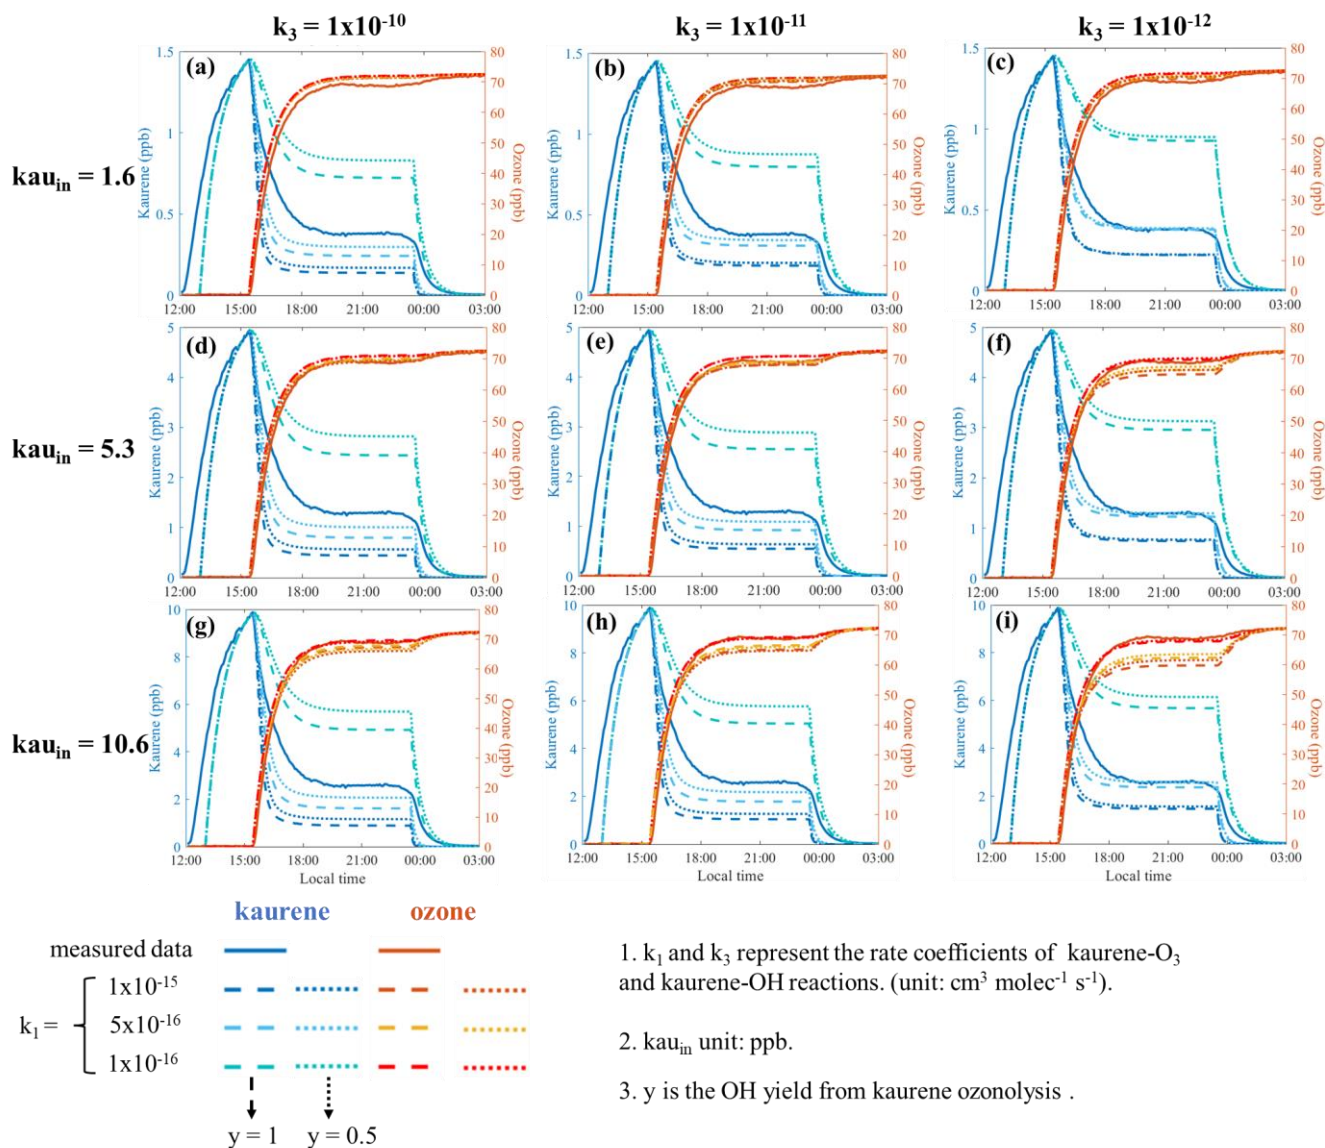

80 **Figure S1. Model results.** Panels (a), (b), and (c) show the results when injected kaurene was set as 1.6 ppb; panels (d), (e), and (f) are the results when we set the injected kaurene to 5.3 ppb; panels (g), (h), and (i) show the model results when 10.6 ppb kaurene was injected. Note that the raw data of the Vocus was scaled roughly to match the modeled concentration and referred to as measured kaurene (blue solid lines) in these plots. We use different kinds of blue to show the trends of kaurene and orange for O<sub>3</sub>. The same color represents the same value of  $k_1$  in the tests. The dashed lines in all panels show the results at  $y=1$ , while the dotted lines are at  $y=0.5$ .

85

**Table S3. Products of kaurene oxidation as identified in the Vocus. Data correspond to Fig. 4b in the main text. All ions are positively charged and shown including the reagent ion (H<sup>+</sup>). f is the fraction of the total signal.**

| C  | H  | O | N | m/z, Th  | f×10 <sup>8</sup> | C  | H  | O | N | m/z, Th  | f×10 <sup>8</sup> |
|----|----|---|---|----------|-------------------|----|----|---|---|----------|-------------------|
| 10 | 15 | 0 | 0 | 135.1170 | 30.3              | 18 | 29 | 2 | 0 | 277.2152 | 1.3               |
| 11 | 17 | 0 | 0 | 149.1326 | 70.6              | 19 | 33 | 1 | 0 | 277.2519 | 0.1               |
| 12 | 19 | 0 | 0 | 163.1482 | 88.6              | 20 | 31 | 1 | 0 | 287.2363 | 1.1               |
| 13 | 21 | 0 | 0 | 177.1638 | 113.8             | 19 | 29 | 2 | 0 | 289.2152 | 0.9               |
| 14 | 23 | 0 | 0 | 191.1794 | 34.3              | 20 | 33 | 1 | 0 | 289.2519 | 2.4               |
| 15 | 23 | 0 | 0 | 203.1794 | 16.6              | 20 | 36 | 0 | 1 | 290.2839 | 44.1              |
| 16 | 25 | 0 | 0 | 217.1950 | 35.7              | 19 | 31 | 2 | 0 | 291.2308 | 17.7              |
| 18 | 25 | 0 | 0 | 241.1950 | 0.3               | 19 | 34 | 1 | 1 | 292.2628 | 20.1              |
| 19 | 29 | 0 | 0 | 257.2262 | 16.4              | 19 | 33 | 2 | 0 | 293.2464 | 18.1              |
| 19 | 31 | 0 | 0 | 259.2418 | 1.2               | 20 | 31 | 2 | 0 | 303.2308 | 0.9               |
| 19 | 33 | 0 | 0 | 261.2574 | 0.8               | 19 | 29 | 3 | 0 | 305.2097 | 0.3               |
| 19 | 27 | 1 | 0 | 271.2051 | 0.6               | 20 | 33 | 2 | 0 | 305.2464 | 0.6               |
| 20 | 31 | 0 | 0 | 271.2418 | 19.1              | 19 | 31 | 3 | 0 | 307.2253 | 0.2               |
| 20 | 32 | 0 | 0 | 272.2496 | 25.1              | 20 | 35 | 2 | 0 | 307.2620 | 0.4               |
| 19 | 29 | 1 | 0 | 273.2207 | 3.4               | 19 | 34 | 2 | 1 | 308.2573 | 5.4               |
| 20 | 33 | 0 | 0 | 273.2574 | 867.7             | 19 | 33 | 3 | 0 | 309.2409 | 1.4               |
| 19 | 30 | 1 | 0 | 274.2285 | 24.5              | 20 | 31 | 3 | 0 | 319.2253 | 0.3               |
| 19 | 31 | 1 | 0 | 275.2363 | 31.9              | 20 | 33 | 3 | 0 | 321.2409 | 36.0              |

90 **Table S4. Products of kaurene oxidation as identified in nitrate CI-API-TOF spectra. Data correspond to Fig. 4 c and d in the main text. All ions are negatively charged and shown including the reagent ion (NO<sub>3</sub><sup>-</sup>). f is the fraction of the total signal.**

| C  | H  | O  | N | m/z, Th  | f×10 <sup>7</sup> | C  | H  | O  | N | m/z, Th  | f×10 <sup>7</sup> |
|----|----|----|---|----------|-------------------|----|----|----|---|----------|-------------------|
| 19 | 28 | 7  | 1 | 382.1858 | 47.0              | 24 | 37 | 10 | 1 | 499.2407 | 3.3               |
| 18 | 28 | 8  | 1 | 386.1807 | 45.0              | 24 | 38 | 10 | 1 | 500.2485 | 1093.4            |
| 19 | 32 | 7  | 1 | 386.2170 | 68.5              | 25 | 42 | 9  | 1 | 500.2848 | 14.4              |
| 20 | 30 | 7  | 1 | 396.2014 | 96.5              | 19 | 26 | 15 | 1 | 508.1294 | 3.1               |
| 19 | 28 | 8  | 1 | 398.1807 | 39.6              | 20 | 30 | 14 | 1 | 508.1657 | 31.3              |
| 18 | 26 | 9  | 1 | 400.1600 | 19.0              | 21 | 34 | 13 | 1 | 508.2020 | 8.6               |
| 19 | 30 | 8  | 1 | 400.1963 | 98.7              | 23 | 27 | 12 | 1 | 509.1525 | 56.2              |
| 19 | 31 | 8  | 1 | 401.2041 | 3.5               | 20 | 31 | 14 | 1 | 509.1735 | 44.6              |
| 18 | 28 | 9  | 1 | 402.1756 | 44.9              | 19 | 28 | 15 | 1 | 510.1450 | 10.4              |
| 19 | 32 | 8  | 1 | 402.2119 | 422.4             | 20 | 32 | 14 | 1 | 510.1813 | 11.0              |
| 19 | 33 | 8  | 1 | 403.2197 | 2.3               | 19 | 30 | 15 | 1 | 512.1606 | 6.1               |
| 20 | 30 | 8  | 1 | 412.1963 | 1086.4            | 20 | 34 | 14 | 1 | 512.1969 | 4.4               |
| 19 | 28 | 9  | 1 | 414.1756 | 694.5             | 25 | 38 | 10 | 1 | 512.2485 | 79.0              |
| 20 | 32 | 8  | 1 | 414.2119 | 40.1              | 26 | 42 | 9  | 1 | 512.2848 | 16.5              |
| 19 | 29 | 9  | 1 | 415.1834 | 6.9               | 24 | 36 | 11 | 1 | 514.2278 | 618.5             |
| 20 | 33 | 8  | 1 | 415.2197 | 11.9              | 25 | 40 | 10 | 1 | 514.2641 | 25.9              |
| 18 | 26 | 10 | 1 | 416.1549 | 25.3              | 23 | 34 | 12 | 1 | 516.2071 | 3.4               |
| 19 | 30 | 9  | 1 | 416.1912 | 171.9             | 21 | 32 | 14 | 1 | 522.1813 | 3.9               |
| 20 | 34 | 8  | 1 | 416.2275 | 50.9              | 23 | 40 | 12 | 1 | 522.2539 | 8.2               |
| 19 | 31 | 9  | 1 | 417.1990 | 67.5              | 20 | 30 | 15 | 1 | 524.1606 | 18.8              |
| 18 | 28 | 10 | 1 | 418.1705 | 61.4              | 26 | 38 | 10 | 1 | 524.2485 | 31.6              |
| 19 | 32 | 9  | 1 | 418.2068 | 115.4             | 27 | 42 | 9  | 1 | 524.2848 | 277.7             |
| 18 | 30 | 10 | 1 | 420.1861 | 58.3              | 20 | 32 | 15 | 1 | 526.1762 | 10.5              |
| 19 | 26 | 10 | 1 | 428.1549 | 10.8              | 26 | 40 | 10 | 1 | 526.2641 | 526.7             |
| 20 | 30 | 9  | 1 | 428.1912 | 312.9             | 27 | 44 | 9  | 1 | 526.3004 | 2.1               |
| 21 | 34 | 8  | 1 | 428.2275 | 2.2               | 19 | 30 | 16 | 1 | 528.1555 | 3.1               |
| 19 | 27 | 10 | 1 | 429.1627 | 6.8               | 25 | 38 | 11 | 1 | 528.2434 | 98.2              |
| 20 | 31 | 9  | 1 | 429.1990 | 15.6              | 26 | 42 | 10 | 1 | 528.2797 | 54.5              |
| 19 | 28 | 10 | 1 | 430.1705 | 122.5             | 25 | 40 | 11 | 1 | 530.2590 | 26.7              |
| 20 | 32 | 9  | 1 | 430.2068 | 77.2              | 24 | 38 | 12 | 1 | 532.2383 | 7.0               |
| 19 | 29 | 10 | 1 | 431.1783 | 90.5              | 25 | 42 | 11 | 1 | 532.2746 | 3.5               |
| 20 | 33 | 9  | 1 | 431.2146 | 9.6               | 27 | 40 | 10 | 1 | 538.2641 | 122.6             |
| 18 | 26 | 11 | 1 | 432.1498 | 21.4              | 28 | 44 | 9  | 1 | 538.3004 | 282.6             |
| 19 | 30 | 10 | 1 | 432.1861 | 554.0             | 26 | 38 | 11 | 1 | 540.2434 | 8.7               |

|    |    |    |   |          |        |    |    |    |   |          |       |
|----|----|----|---|----------|--------|----|----|----|---|----------|-------|
| 20 | 34 | 9  | 1 | 432.2224 | 13.8   | 27 | 42 | 10 | 1 | 540.2797 | 248.6 |
| 18 | 27 | 11 | 1 | 433.1576 | 52.1   | 28 | 46 | 9  | 1 | 540.3160 | 1.9   |
| 19 | 31 | 10 | 1 | 433.1939 | 40.3   | 26 | 40 | 11 | 1 | 542.2590 | 69.4  |
| 18 | 28 | 11 | 1 | 434.1654 | 62.0   | 27 | 44 | 10 | 1 | 542.2953 | 14.8  |
| 19 | 32 | 10 | 1 | 434.2017 | 96.7   | 24 | 33 | 13 | 1 | 543.1942 | 5.6   |
| 18 | 29 | 11 | 1 | 435.1732 | 37.5   | 27 | 45 | 10 | 1 | 543.3031 | 1.4   |
| 19 | 33 | 10 | 1 | 435.2095 | 4.3    | 22 | 26 | 15 | 1 | 544.1294 | 1.5   |
| 20 | 28 | 10 | 1 | 442.1705 | 7.6    | 25 | 38 | 12 | 1 | 544.2383 | 15.9  |
| 21 | 32 | 9  | 1 | 442.2068 | 76.8   | 26 | 42 | 11 | 1 | 544.2746 | 4.2   |
| 22 | 36 | 8  | 1 | 442.2431 | 6.3    | 23 | 38 | 14 | 1 | 552.2281 | 2.0   |
| 20 | 30 | 10 | 1 | 444.1861 | 882.8  | 24 | 42 | 13 | 1 | 552.2644 | 6.1   |
| 21 | 34 | 9  | 1 | 444.2224 | 15.5   | 28 | 42 | 10 | 1 | 552.2797 | 20.5  |
| 20 | 31 | 10 | 1 | 445.1939 | 43.7   | 29 | 46 | 9  | 1 | 552.3160 | 13.7  |
| 21 | 35 | 9  | 1 | 445.2302 | 9.1    | 27 | 40 | 11 | 1 | 554.2590 | 141.8 |
| 19 | 28 | 11 | 1 | 446.1654 | 1904.3 | 28 | 44 | 10 | 1 | 554.2953 | 88.7  |
| 20 | 32 | 10 | 1 | 446.2017 | 132.9  | 26 | 38 | 12 | 1 | 556.2383 | 5.7   |
| 18 | 25 | 12 | 1 | 447.1369 | 20.9   | 27 | 42 | 11 | 1 | 556.2746 | 107.7 |
| 19 | 29 | 11 | 1 | 447.1732 | 31.1   | 28 | 46 | 10 | 1 | 556.3109 | 3.7   |
| 20 | 33 | 10 | 1 | 447.2095 | 8.8    | 24 | 40 | 14 | 1 | 566.2437 | 3.2   |
| 18 | 26 | 12 | 1 | 448.1447 | 18.9   | 29 | 44 | 10 | 1 | 566.2953 | 28.2  |
| 19 | 30 | 11 | 1 | 448.1810 | 173.6  | 28 | 42 | 11 | 1 | 568.2746 | 66.3  |
| 20 | 34 | 10 | 1 | 448.2173 | 19.1   | 29 | 46 | 10 | 1 | 568.3109 | 88.4  |
| 18 | 27 | 12 | 1 | 449.1525 | 33.1   | 27 | 40 | 12 | 1 | 570.2539 | 11.1  |
| 19 | 31 | 11 | 1 | 449.1888 | 66.0   | 28 | 44 | 11 | 1 | 570.2902 | 136.4 |
| 18 | 28 | 12 | 1 | 450.1603 | 102.7  | 29 | 48 | 10 | 1 | 570.3265 | 20.0  |
| 19 | 32 | 11 | 1 | 450.1966 | 31.1   | 27 | 42 | 12 | 1 | 572.2695 | 23.6  |
| 18 | 29 | 12 | 1 | 451.1681 | 21.8   | 28 | 46 | 11 | 1 | 572.3058 | 3.7   |
| 22 | 34 | 9  | 1 | 456.2224 | 550.4  | 29 | 44 | 11 | 1 | 582.2902 | 53.5  |
| 23 | 38 | 8  | 1 | 456.2587 | 6.3    | 28 | 42 | 12 | 1 | 584.2695 | 15.8  |
| 20 | 28 | 11 | 1 | 458.1654 | 9.1    | 29 | 46 | 11 | 1 | 584.3058 | 78.9  |
| 21 | 32 | 10 | 1 | 458.2017 | 5.4    | 26 | 36 | 14 | 1 | 586.2125 | 3.0   |
| 22 | 36 | 9  | 1 | 458.2380 | 7.2    | 28 | 44 | 12 | 1 | 586.2851 | 25.7  |
| 19 | 26 | 12 | 1 | 460.1447 | 20.1   | 27 | 42 | 13 | 1 | 588.2644 | 16.9  |
| 20 | 30 | 11 | 1 | 460.1810 | 227.9  | 29 | 50 | 11 | 1 | 588.3370 | 5.6   |
| 21 | 34 | 10 | 1 | 460.2173 | 6.1    | 26 | 40 | 14 | 1 | 590.2437 | 2.6   |
| 19 | 27 | 12 | 1 | 461.1525 | 18.1   | 27 | 44 | 13 | 1 | 590.2800 | 3.3   |
| 20 | 31 | 11 | 1 | 461.1888 | 64.8   | 28 | 48 | 12 | 1 | 590.3163 | 0.8   |

|    |    |    |   |          |       |    |    |    |   |          |      |
|----|----|----|---|----------|-------|----|----|----|---|----------|------|
| 18 | 24 | 13 | 1 | 462.1240 | 9.1   | 29 | 42 | 12 | 1 | 596.2695 | 2.6  |
| 19 | 28 | 12 | 1 | 462.1603 | 97.1  | 28 | 40 | 13 | 1 | 598.2488 | 1.0  |
| 20 | 32 | 11 | 1 | 462.1966 | 87.3  | 29 | 44 | 12 | 1 | 598.2851 | 30.2 |
| 18 | 25 | 13 | 1 | 463.1318 | 11.1  | 27 | 38 | 14 | 1 | 600.2281 | 0.7  |
| 19 | 29 | 12 | 1 | 463.1681 | 73.5  | 28 | 42 | 13 | 1 | 600.2644 | 8.7  |
| 20 | 33 | 11 | 1 | 463.2044 | 23.3  | 29 | 46 | 12 | 1 | 600.3007 | 12.2 |
| 18 | 26 | 13 | 1 | 464.1396 | 11.9  | 27 | 40 | 14 | 1 | 602.2437 | 2.7  |
| 19 | 30 | 12 | 1 | 464.1759 | 172.4 | 28 | 44 | 13 | 1 | 602.2800 | 6.3  |
| 20 | 34 | 11 | 1 | 464.2122 | 15.8  | 29 | 48 | 12 | 1 | 602.3163 | 4.1  |
| 19 | 31 | 12 | 1 | 465.1837 | 17.2  | 27 | 42 | 14 | 1 | 604.2593 | 6.3  |
| 18 | 28 | 13 | 1 | 466.1552 | 26.7  | 29 | 50 | 12 | 1 | 604.3319 | 2.7  |
| 19 | 32 | 12 | 1 | 466.1915 | 18.1  | 29 | 46 | 14 | 1 | 632.2905 | 6.5  |
| 19 | 26 | 13 | 1 | 476.1396 | 3.8   | 29 | 44 | 15 | 1 | 646.2698 | 3.8  |
| 20 | 30 | 12 | 1 | 476.1759 | 127.5 | 37 | 58 | 9  | 1 | 660.4096 | 10.8 |
| 21 | 34 | 11 | 1 | 476.2122 | 9.1   | 38 | 60 | 9  | 1 | 674.4252 | 83.6 |
| 19 | 27 | 13 | 1 | 477.1474 | 20.3  | 38 | 58 | 10 | 1 | 688.4045 | 3.3  |
| 20 | 31 | 12 | 1 | 477.1837 | 55.4  | 39 | 62 | 9  | 1 | 688.4408 | 15.8 |
| 21 | 35 | 11 | 1 | 477.2200 | 1.1   | 40 | 66 | 8  | 1 | 688.4771 | 0.2  |
| 19 | 28 | 13 | 1 | 478.1552 | 479.6 | 38 | 60 | 10 | 1 | 690.4201 | 8.9  |
| 20 | 32 | 12 | 1 | 478.1915 | 75.8  | 39 | 64 | 9  | 1 | 690.4564 | 5.4  |
| 19 | 29 | 13 | 1 | 479.1630 | 44.4  | 40 | 68 | 8  | 1 | 690.4927 | 0.6  |
| 20 | 33 | 12 | 1 | 479.1993 | 7.7   | 37 | 58 | 11 | 1 | 692.3994 | 9.4  |
| 18 | 26 | 14 | 1 | 480.1345 | 14.7  | 38 | 62 | 10 | 1 | 692.4357 | 0.5  |
| 19 | 30 | 13 | 1 | 480.1708 | 42.3  | 39 | 66 | 9  | 1 | 692.4720 | 1.1  |
| 20 | 34 | 12 | 1 | 480.2071 | 9.7   | 38 | 58 | 11 | 1 | 704.3994 | 7.2  |
| 18 | 27 | 14 | 1 | 481.1423 | 3.4   | 39 | 62 | 10 | 1 | 704.4357 | 4.7  |
| 19 | 31 | 13 | 1 | 481.1786 | 6.3   | 40 | 66 | 9  | 1 | 704.4720 | 1.3  |
| 19 | 32 | 13 | 1 | 482.1864 | 11.4  | 38 | 60 | 11 | 1 | 706.4150 | 18.9 |
| 22 | 32 | 11 | 1 | 486.1966 | 1.2   | 39 | 64 | 10 | 1 | 706.4513 | 10.0 |
| 23 | 36 | 10 | 1 | 486.2329 | 100.2 | 37 | 58 | 12 | 1 | 708.3943 | 4.4  |
| 24 | 40 | 9  | 1 | 486.2692 | 1.4   | 38 | 62 | 11 | 1 | 708.4306 | 7.1  |
| 19 | 26 | 14 | 1 | 492.1345 | 8.0   | 38 | 58 | 12 | 1 | 720.3943 | 2.9  |
| 20 | 30 | 13 | 1 | 492.1708 | 55.7  | 39 | 62 | 11 | 1 | 720.4306 | 9.7  |
| 21 | 34 | 12 | 1 | 492.2071 | 5.2   | 38 | 60 | 12 | 1 | 722.4099 | 7.5  |
| 19 | 27 | 14 | 1 | 493.1423 | 4.7   | 39 | 64 | 11 | 1 | 722.4462 | 11.6 |
| 20 | 31 | 13 | 1 | 493.1786 | 37.7  | 37 | 58 | 13 | 1 | 724.3892 | 4.3  |
| 21 | 35 | 12 | 1 | 493.2149 | 4.1   | 38 | 62 | 12 | 1 | 724.4255 | 3.8  |



|    |    |    |   |          |       |    |    |    |   |          |     |
|----|----|----|---|----------|-------|----|----|----|---|----------|-----|
| 19 | 28 | 14 | 1 | 494.1501 | 24.7  | 38 | 58 | 13 | 1 | 736.3892 | 5.5 |
| 20 | 32 | 13 | 1 | 494.1864 | 27.6  | 39 | 62 | 12 | 1 | 736.4255 | 8.1 |
| 21 | 36 | 12 | 1 | 494.2227 | 0.6   | 38 | 60 | 13 | 1 | 738.4048 | 6.5 |
| 20 | 33 | 13 | 1 | 495.1942 | 16.2  | 39 | 64 | 12 | 1 | 738.4411 | 5.2 |
| 19 | 30 | 14 | 1 | 496.1657 | 16.5  | 38 | 58 | 15 | 1 | 768.3790 | 2.6 |
| 20 | 34 | 13 | 1 | 496.2020 | 10.8  | 39 | 62 | 14 | 1 | 768.4153 | 6.0 |
| 19 | 32 | 14 | 1 | 498.1813 | 5.7   | 40 | 66 | 13 | 1 | 768.4516 | 0.8 |
| 24 | 36 | 10 | 1 | 498.2329 | 200.0 | 40 | 66 | 14 | 1 | 784.4465 | 2.3 |
| 25 | 40 | 9  | 1 | 498.2692 | 10.2  | 40 | 64 | 15 | 1 | 798.4258 | 2.2 |

---

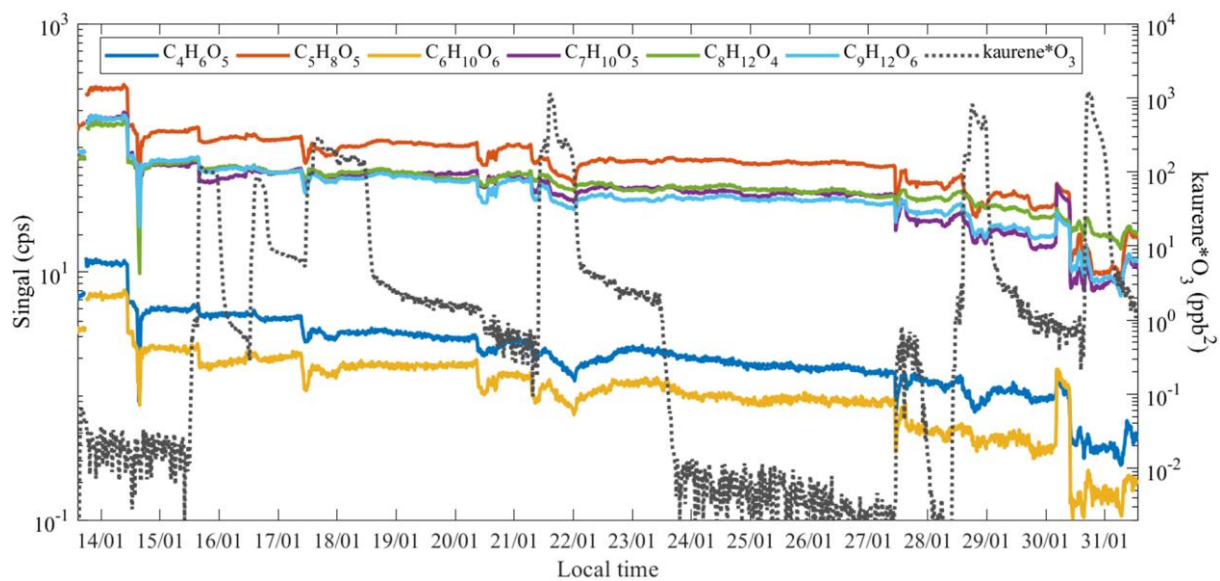

95 **Figure S2. Temporal behaviors of the main contaminants. The most abundant contaminant in each group with different carbon numbers is shown here.  $C_8H_{12}O_4$  was detected by Vocus, while the other five contaminants shown here were detected by nitrate CI-API-TOF. The dark gray dashed line depicts the kaurene ozonolysis rate ( $kaurene \cdot O_3$  in the right y-axis).**

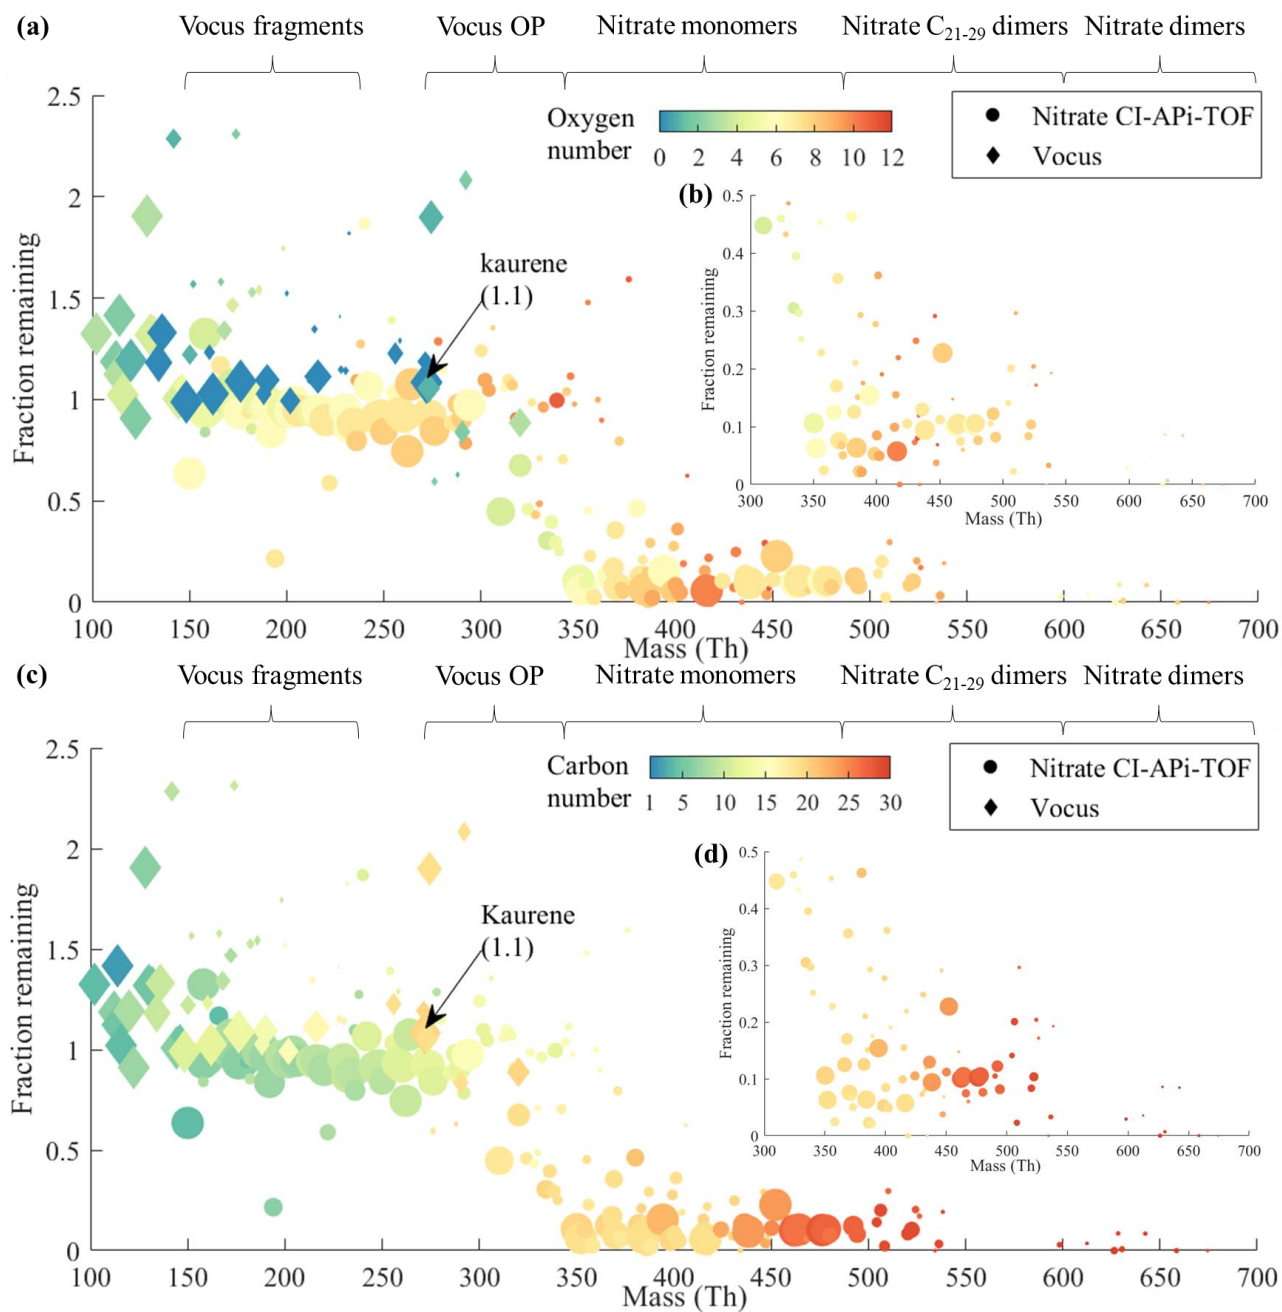

100 **Figure S3. Seed injection behaviour.** The fraction remaining factor corresponds to the ratio of the signal after seed particles injection to seed removal. The molar mass indicated on the x-axis is without the reagent ions. The color indicates the carbon numbers in the composition. The area of circles and diamonds is scaled linearly to the magnitude of each compound's signal when there were no seed particles in the chamber. Compounds with average signal intensities (during the steady state before seed injection) below three times the standard deviation are excluded from the plots. The text at the top shows roughly which compound groups are found in

105 which parts of the mass range. The 'Vocus fragments' refers to the kaurene fragments, and 'Vocus OP' refers to C<sub>18-20</sub> oxidation products. 'Nitrate monomers', 'Nitrate C<sub>21-29</sub> dimers', and 'Nitrate dimers' represent the C<sub>18-20</sub> HOM monomers, C<sub>21-29</sub> HOM dimers, and C<sub>37-40</sub> HOM dimers measured with nitrate CI-API-TOF, respectively. The zoomed-in views of the mass range above 300 Th are shown in panels (b) and (d).

## References

110 Atkinson, R., Baulch, D. L., Cox, R. A., Crowley, J. N., Hampson, R. F., Hynes, R. G., Jenkin, M. E., Rossi, M. J., and Troe, J.: Evaluated kinetic and photochemical data for atmospheric chemistry: Volume I - gas phase reactions of Ox, HOx, NOx and SOx species, Atmospheric Chemistry and Physics, 4, 1461-1738, 10.5194/acp-4-1461-2004, 2004.

Helin, A., Hakola, H., and Hellén, H.: Optimisation of a thermal desorption–gas chromatography–mass spectrometry method for the analysis of monoterpenes, sesquiterpenes and diterpenes, Atmospheric Measurement Techniques 13, 3543-3560, 10.5194/amt-13-3543-2020, 2020.

115
